# Supplementary material
Source: publisher figshare collection journal article supplement (https://gsapubs.figshare.com/ndownloader/files/31185091)
Supplement: Supplementary file 1 [file 31185091]

# Geological Map of the Mangatolu Triple Junction

## 2019

Scale 1:200 000

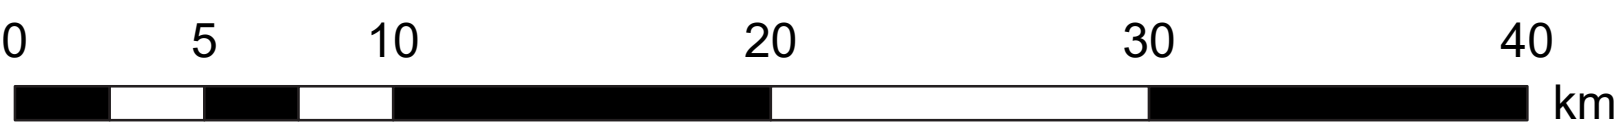

| LABEL                                                                                                                                       |                                            | UNIT NAME AND DESCRIPTION                                                                                                                                                                                                                                                                   |  |
|---------------------------------------------------------------------------------------------------------------------------------------------|--------------------------------------------|---------------------------------------------------------------------------------------------------------------------------------------------------------------------------------------------------------------------------------------------------------------------------------------------|--|
| BACKARC VOLCANOES                                                                                                                           |                                            |                                                                                                                                                                                                                                                                                             |  |
| <div>Bav</div>                                                                                                                              | <b>Volcano</b>                             | A cone-shaped, mound-shaped, steep-sided, or elongate volcanic edifice composed mostly of lava flows extruded onto backarc crust or onto an axial volcanic ridge                                                                                                                            |  |
| <div>Bavf</div>                                                                                                                             | <b>Volcanic field</b>                      | A broad area of lava flows and volcanoclastic material surrounding a number of closely-spaced volcanoes                                                                                                                                                                                     |  |
| BACKARC RIFTS AND SPREADING CENTERS                                                                                                         |                                            |                                                                                                                                                                                                                                                                                             |  |
| Upper                                                                                                                                       |                                            |                                                                                                                                                                                                                                                                                             |  |
| <b>Axial backarc volcanic ridge (uBar)</b>                                                                                                  |                                            |                                                                                                                                                                                                                                                                                             |  |
| Volcanic ridge marking the active spreading center, commonly with discrete volcanic edifices (cones and domes), dike complexes, or calderas |                                            |                                                                                                                                                                                                                                                                                             |  |
| <div>uBar1</div>                                                                                                                            | <b>Axial volcanic ridge</b>                | Elongate volcanic edifice along the spreading axis                                                                                                                                                                                                                                          |  |
| <div>uBar2</div>                                                                                                                            | <b>Inner rift rise</b>                     | Region of magmatic inflation along a spreading center or single arm of a triple junction                                                                                                                                                                                                    |  |
| <div>uBar3</div>                                                                                                                            | <b>Central volcanic rise</b>               | Region of magmatic inflation at the center of a triple junction                                                                                                                                                                                                                             |  |
| <b>Axial backarc crust (uBac)</b>                                                                                                           |                                            |                                                                                                                                                                                                                                                                                             |  |
| Undivided backarc crust in the axial or inner rift valley of an active spreading center                                                     |                                            |                                                                                                                                                                                                                                                                                             |  |
| <div>uBac1</div>                                                                                                                            | <b>Axial rift valley</b>                   | Backarc crust along the spreading axis                                                                                                                                                                                                                                                      |  |
| <div>uBac2</div>                                                                                                                            | <b>Inner rift valley</b>                   | Backarc crust in the inner rift valley bounded by active, inward-dipping faults                                                                                                                                                                                                             |  |
| Middle                                                                                                                                      |                                            |                                                                                                                                                                                                                                                                                             |  |
| <div>mBar</div>                                                                                                                             | <b>Proximal volcanic or tectonic ridge</b> | Elongate volcanic edifice or coalesced ridges in the outer rift valley or on the flank, adjacent to an active spreading center or axial volcanic ridge                                                                                                                                      |  |
| <div>mBac</div>                                                                                                                             | <b>Proximal backarc crust</b>              | Undivided backarc crust in the outer rift valley, adjacent to an active spreading center or axial volcanic ridge (may include products of off-axis volcanism)                                                                                                                               |  |
| <div>mBaf</div>                                                                                                                             | <b>Backarc rift flank</b>                  | Undivided backarc crust on the flank of the outer rift valley, including volcanic ridges, volcanoclastic material, and flows (may include products of off-axis volcanism)                                                                                                                   |  |
| Lower                                                                                                                                       |                                            |                                                                                                                                                                                                                                                                                             |  |
| <div>lBar</div>                                                                                                                             | <b>Distal volcanic ridge</b>               | Elongate volcanic edifice or coalesced ridges on distal backarc crust (may include products of off-axis volcanism or earlier seafloor spreading from a distant ridge;commonly obscured by volcanoclastic cover)                                                                             |  |
| <div>lBac1</div>                                                                                                                            | <b>Distal backarc crust</b>                | Undivided backarc crust beyond the outer rift valley and flank of an active spreading center (may include products of off-axis volcanism)                                                                                                                                                   |  |
| RELICT BACKARC                                                                                                                              |                                            |                                                                                                                                                                                                                                                                                             |  |
| Upper                                                                                                                                       |                                            |                                                                                                                                                                                                                                                                                             |  |
| <div>uRbc1</div>                                                                                                                            | <b>Upper relict backarc crust</b>          | Undivided backarc crust outside an identifiable area of active spreading (may be a product of intraplate volcanism, rifting of earlier backarc crust, or an unknown spreading center). <i>Unit shown in 1:1 million map of the Lau Basin but not in Mangatolu Triple Junction map sheet</i> |  |
| <div>uRbc2</div>                                                                                                                            | <b>Tectonized relict backarc crust</b>     | Intensely deformed backarc crust outside an identifiable area of active spreading                                                                                                                                                                                                           |  |
| Lower                                                                                                                                       |                                            |                                                                                                                                                                                                                                                                                             |  |
| <div>lRbc</div>                                                                                                                             | <b>Lower relict backarc crust</b>          | Earliest exposed extrusive and intrusive rocks in the backarc and outside an identifiable area of active spreading                                                                                                                                                                          |  |
| SYMBOLS                                                                                                                                     |                                            |                                                                                                                                                                                                                                                                                             |  |
| <div></div>                                                                                                                                 |                                            | Spreading center                                                                                                                                                                                                                                                                            |  |

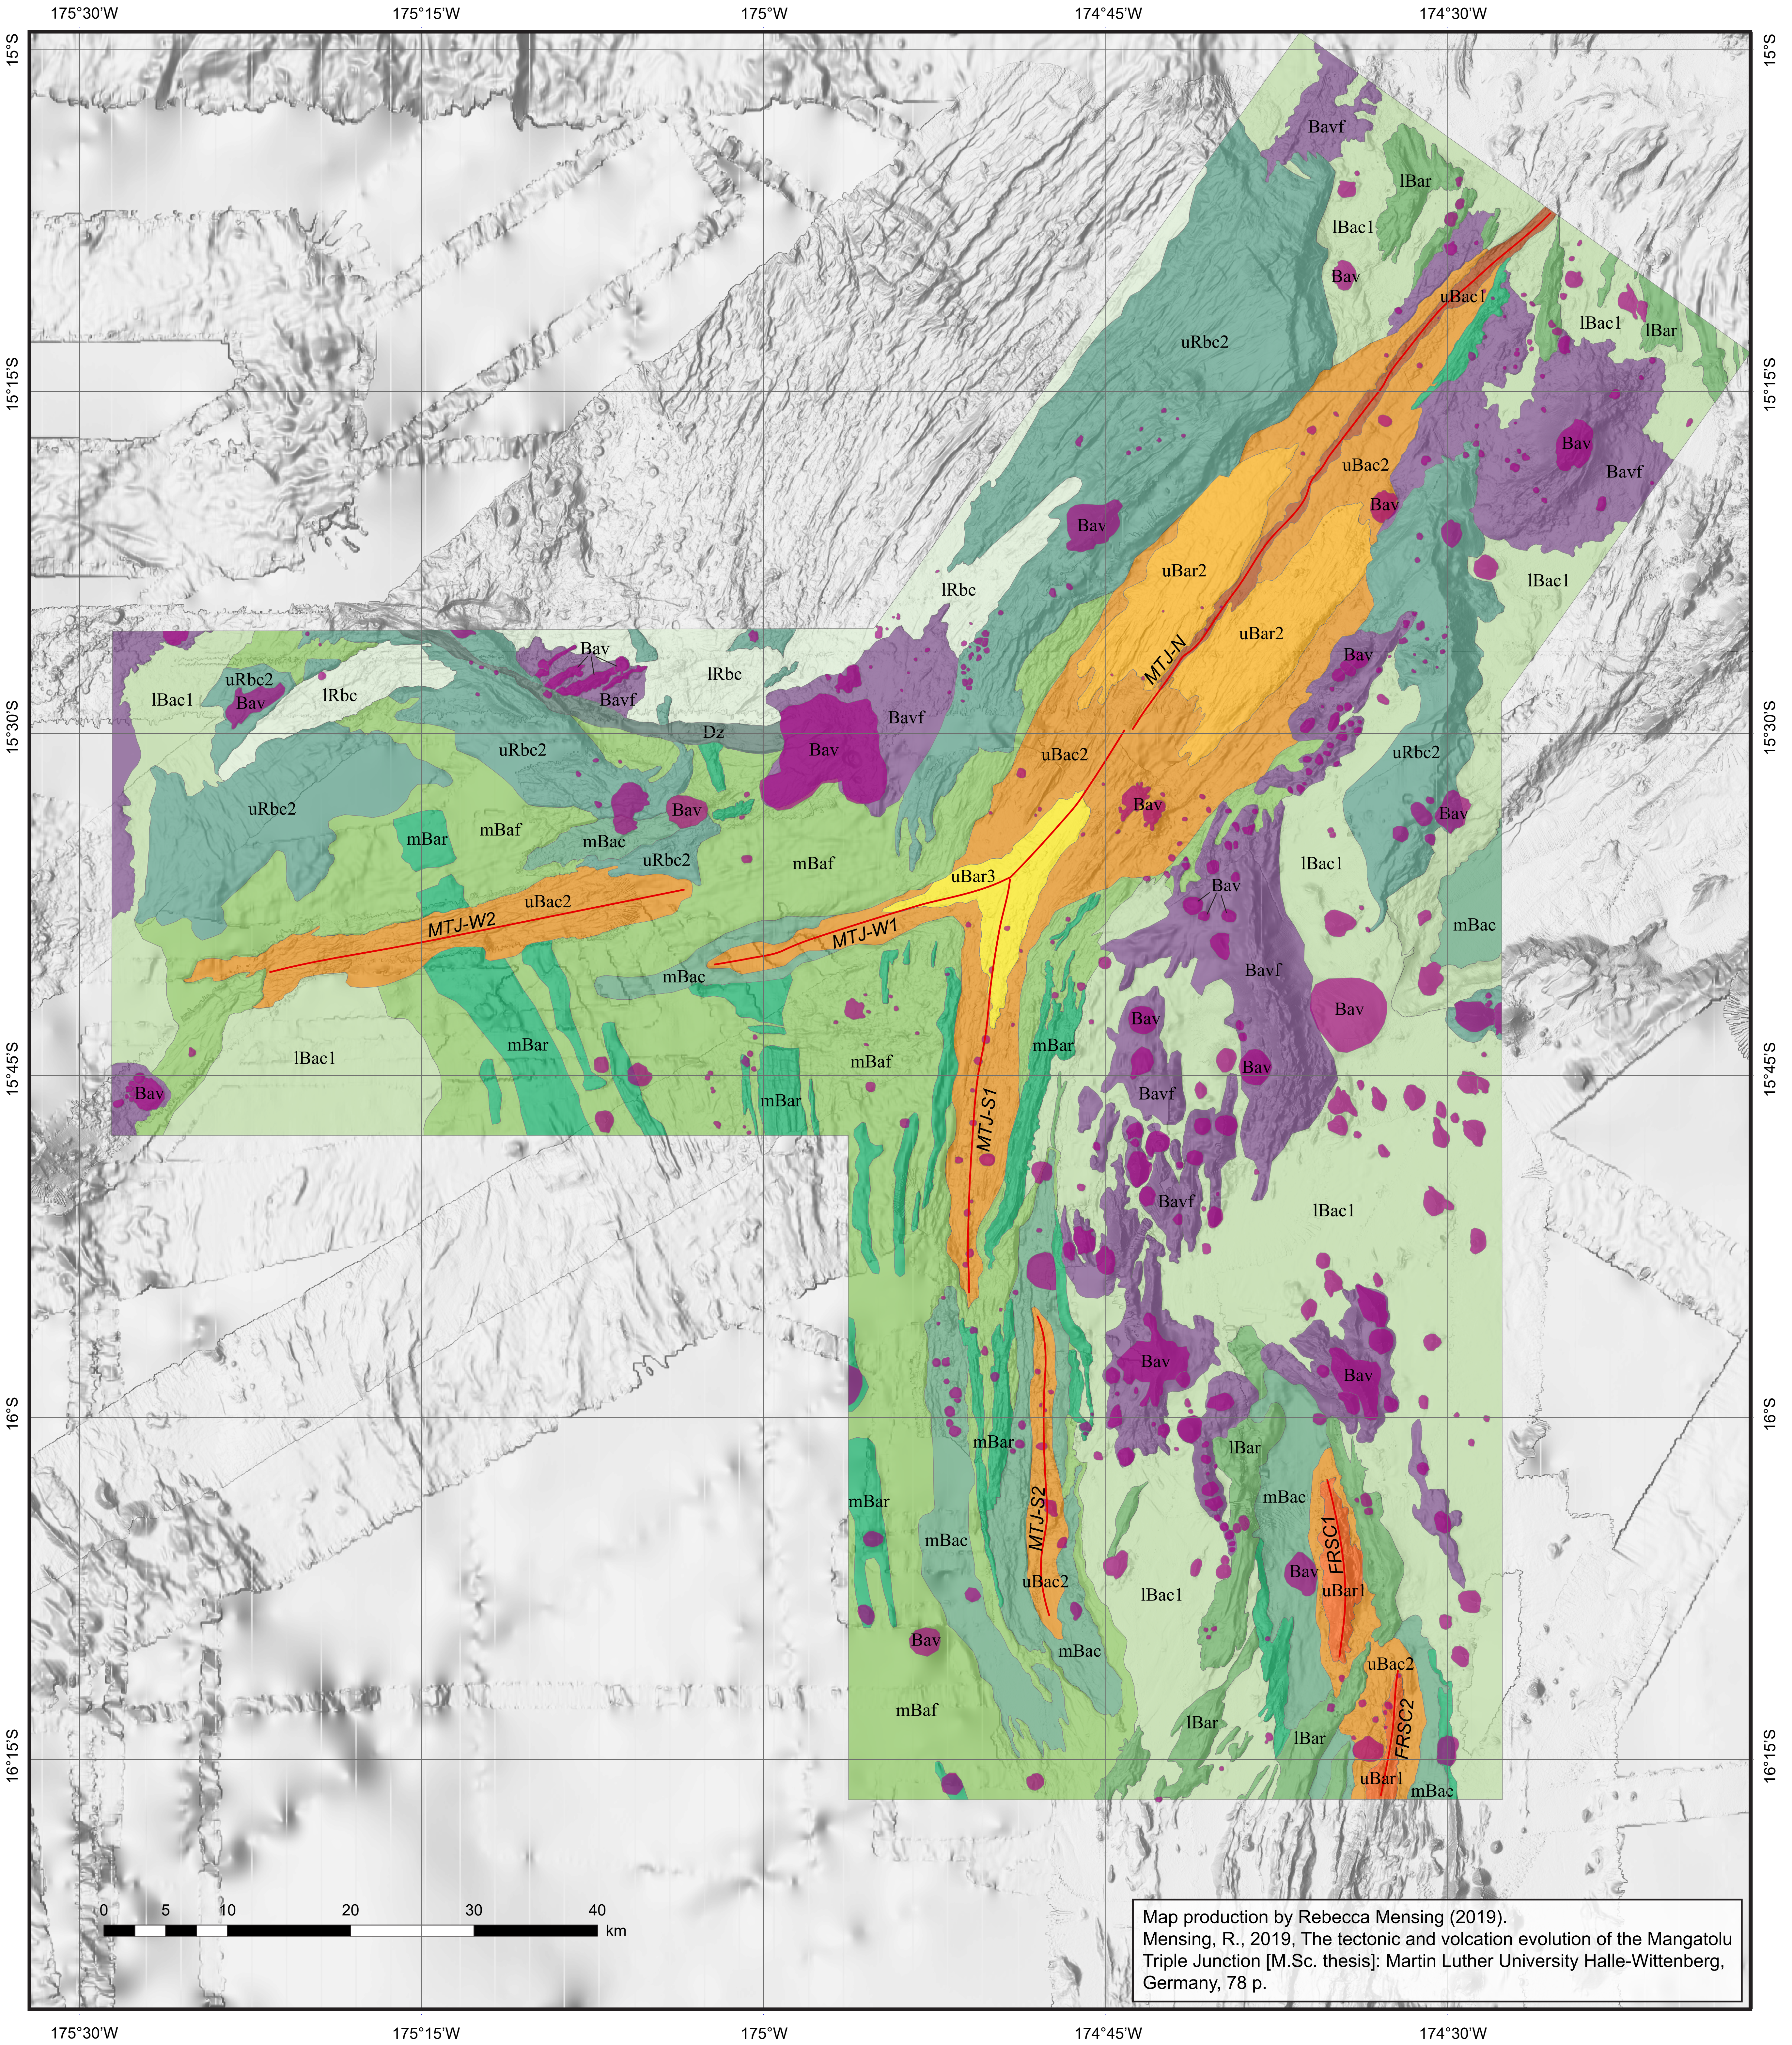

Map production by Rebecca Mensing (2019).  
Mensing, R., 2019, The tectonic and volcation evolution of the Mangatolu Triple Junction [M.Sc. thesis]: Martin Luther University Halle-Wittenberg, Germany, 78 p.
